# Supplementary material for: NDI-integrated rotaxane/catenane and their interactions with anions
Source: Royal Society of Chemistry journal article supplement (doi:10.1039/d2dt01908f), 2022-01-01
Supplement: d2dt01908f1.pdf [file d2dt01908f1.pdf]

## Supporting Information

for

### *NDI integrated rotaxane/catenane and their interactions*

### *with anions*

Mandira Nandi, Somnath Bej and Pradyut Ghosh\*

*School of Chemical Sciences, Indian Association for the Cultivation of Science, 2A & 2B Raja  
S. C. Mullick Road, Kolkata 700032, India. E-mail: [icpg@iacs.res.in](mailto:icpg@iacs.res.in)*

#### TABLE OF CONTENTS

|                                                                                     |         |
|-------------------------------------------------------------------------------------|---------|
| 1. Synthetic Scheme.....                                                            | 3S      |
| (i) <b>Scheme S1:</b> Synthesis of Na-PhenMC and Ca-PhenMC                          |         |
| (ii) <b>Scheme S2:</b> Synthetic scheme of Ca-PRT                                   |         |
| (iii) <b>Scheme S3:</b> Synthetic scheme of HEXPR                                   |         |
| 2. ESI-MS spectra of Na-PhenMC and Ca-PhenMC (Figure S1) .....                      | 4S      |
| 3. Single Crystal X-ray structure of Na-PhenMC (Figure S2) .....                    | 4S      |
| 5. Crystallographic details of Na-PhenMC (Table S1) .....                           | 5S      |
| 6. Characterization of NDIAz (Figure S3-S6) .....                                   | 6S-7S   |
| 7. ESI-MS spectrum of Ca-PRT (Figure S7) .....                                      | 8S      |
| 8. Non-linear 1:1 curve fitting plot (Figure S8) .....                              | 8S      |
| 9. <sup>1</sup> H and Comparative NMR spectra of Ca-PRT (Figure S9-S9a) .....       | 9S      |
| 10. Characterization of HEXPR (Figure S10-S12) .....                                | 10S-11S |
| 11. ESI-MS spectrum of Ca-NDIROT and NDIROT (Figure S13-S14) .....                  | 11S-12S |
| 12. ESI-MS spectrum of Ca-NDICAT and NDICAT (Figure S15-S16) .....                  | 12S-13S |
| 13. <sup>1</sup> H, <sup>13</sup> C and ROESY NMR of NDIROT (Figure S17-S18a) ..... | 13S-14S |
| 14. Characterization of NDI-AxSTP (Figure S19-S20) .....                            | 15S     |
| 15. <sup>1</sup> H, <sup>13</sup> C and ROESY NMR of NDICAT (Figure S21-S22a) ..... | 16S-17S |
| 16. Characterization of NDIMC (Figure S23-S24) .....                                | 17S-18S |
| 17. UV-Vis and PL spectrum of NDIROT and NDICAT (Figure S25-S26) .....              | 18S-19S |

|                                                                                                                      |     |
|----------------------------------------------------------------------------------------------------------------------|-----|
| <b>18. Colorimetric changes of NDIROT and NDICAT (Figure S27)</b> .....                                              | 19S |
| <b>19. UV-Vis-NIR changes of NDICAT and NDIROT (Figure S28)</b> .....                                                | 19S |
| <b>20. X-band EPR spectra of NDICAT upon addition of F<sup>-</sup> (Figure S29)</b> .....                            | 20S |
| <b>21. <sup>1</sup>H NMR spectra of NDIROT/NDICAT with different equivalents of F<sup>-</sup> (Figure S30)</b> ..... | 20S |
| <b>22. Comparative PL spectra of NDIROT and NDICAT upon addition of various TBAanions (Figure S31)</b> .....         | 21S |

## Synthetic Scheme

**Scheme S1:** Synthetic scheme of Na-PhenMC and Ca-PhenMC

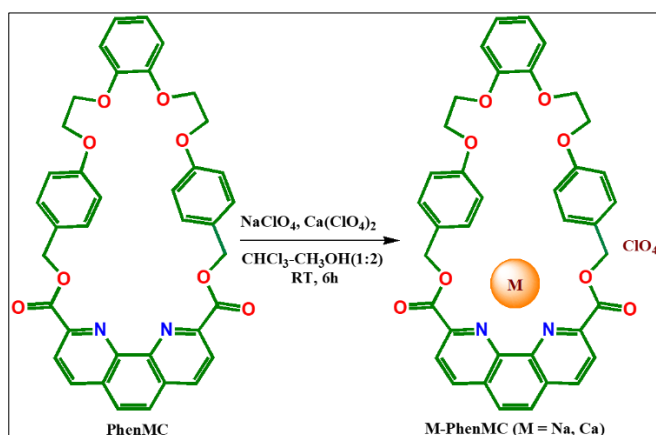

**Scheme S2:** Synthetic scheme of Ca-PRT

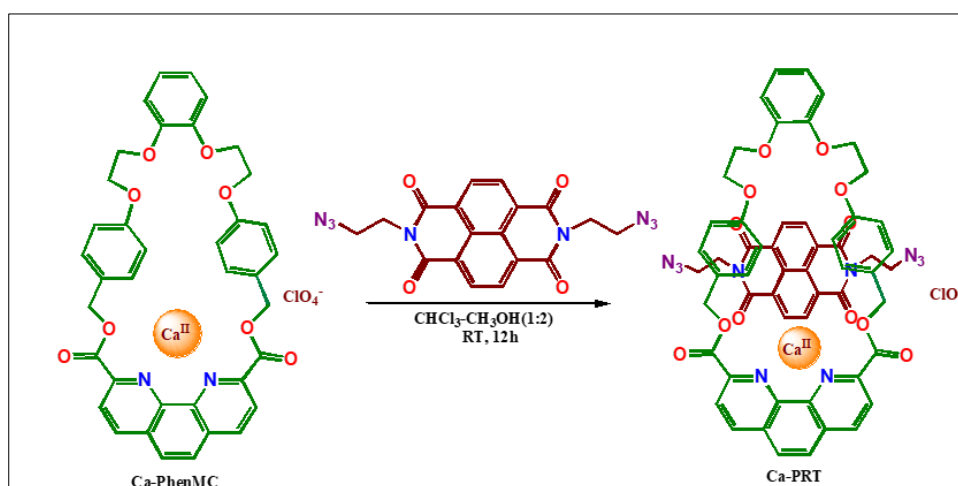

**Scheme S3:** Synthetic scheme of HEXPR

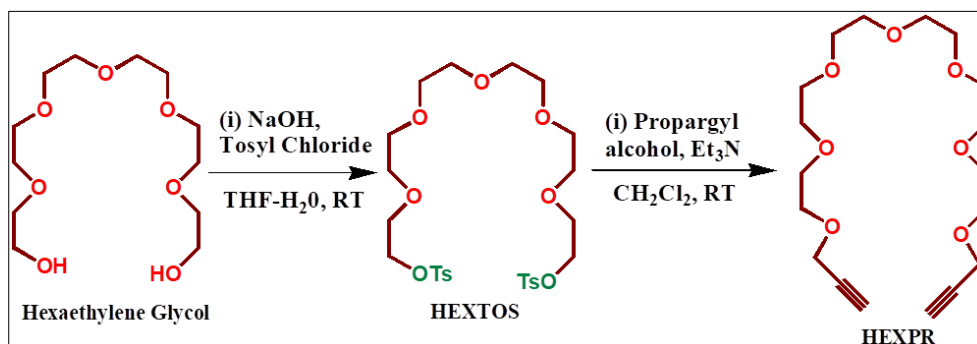

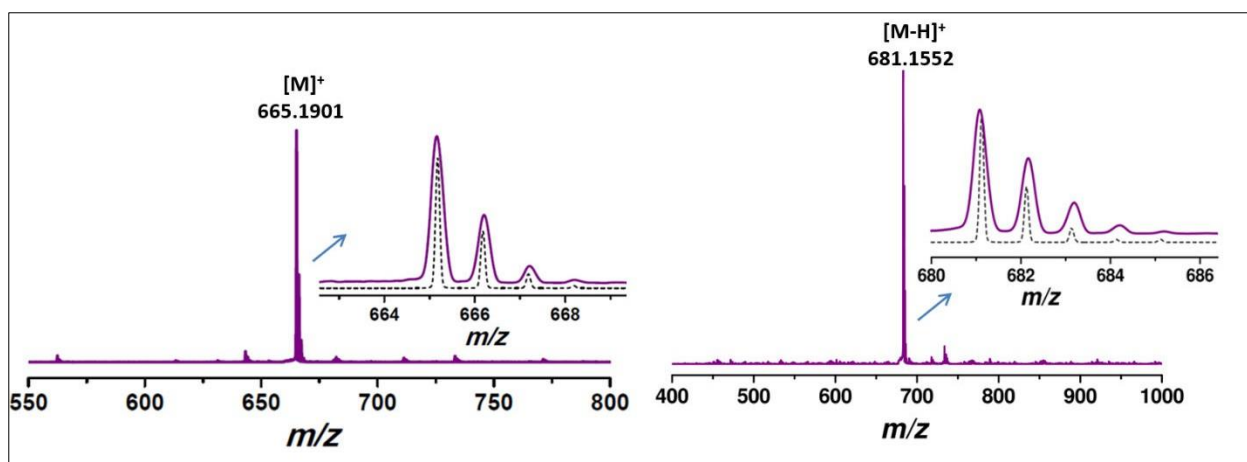

**Figure S1:** ESI-MS (+ve ion) spectra of i) *Na-PhenMC* and ii) *Ca-PhenMC* at 298K. Inset picture shows the similarity between isotopic distribution pattern (dotted) and the calculated (bold) one.

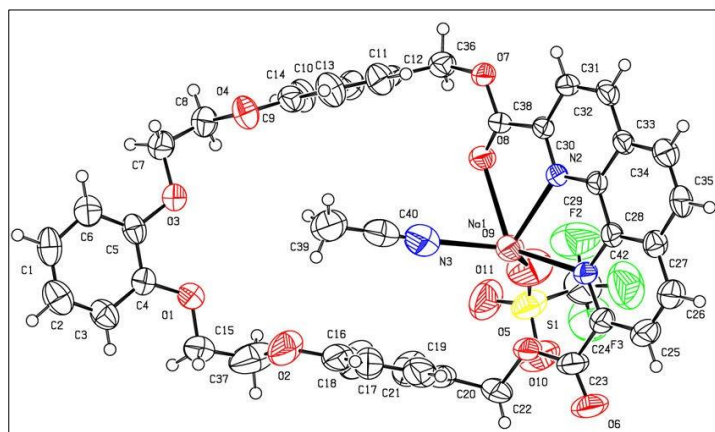

**Figure S2:** Single Crystal X-ray structure of *Na-PhenMC* (ellipsoid model using platon version)

**Table S1:** Crystallographic details of **Na-PhenMC**

|                                              |                        |
|----------------------------------------------|------------------------|
| Compound reference                           | PHENMCNa               |
| Chemical formula                             | C41 H33 F3 N3 Na O11 S |
| Formula Mass                                 | 855.75                 |
| Crystal system                               | Triclinic              |
| $a/\text{\AA}$                               | 9.632(5)               |
| $b/\text{\AA}$                               | 11.523(6)              |
| $c/\text{\AA}$                               | 18.177(10)             |
| $\alpha/^\circ$                              | 90.087(19)             |
| $\beta/^\circ$                               | 93.53(2)               |
| $\gamma/^\circ$                              | 94.613(17)             |
| Unit cell volume/ $\text{\AA}^3$             | 2007.0(18)             |
| Temperature/K                                | 150(2)                 |
| Space group                                  | <i>P</i> 1             |
| No. of formula units per unit cell, <i>Z</i> | 2                      |
| Radiation type                               | MoK $\alpha$           |
| Absorption coefficient, $\mu/\text{mm}^{-1}$ | 0.170                  |
| No. of reflections measured                  | 10968                  |
| No. of independent reflections               | 5249                   |
| $R_{int}$                                    | 0.0740                 |
| Final $R_I$ values ( $I > 2\sigma(I)$ )      | 0.0679                 |
| Final $wR(F^2)$ values ( $I > 2\sigma(I)$ )  | 0.1670                 |
| Final $R_I$ values (all data)                | 0.1391                 |
| Final $wR(F^2)$ values (all data)            | 0.2151                 |
| Goodness of fit on $F^2$                     | 1.000                  |
| CCDC number                                  | 2167711                |

...

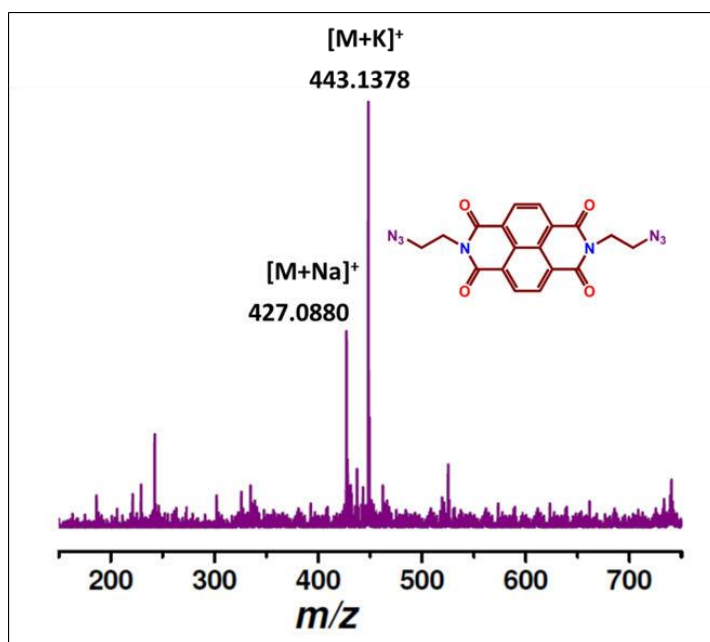

Figure S3. ESI-MS (+ve ion) spectrum of NDIAz at 298K.

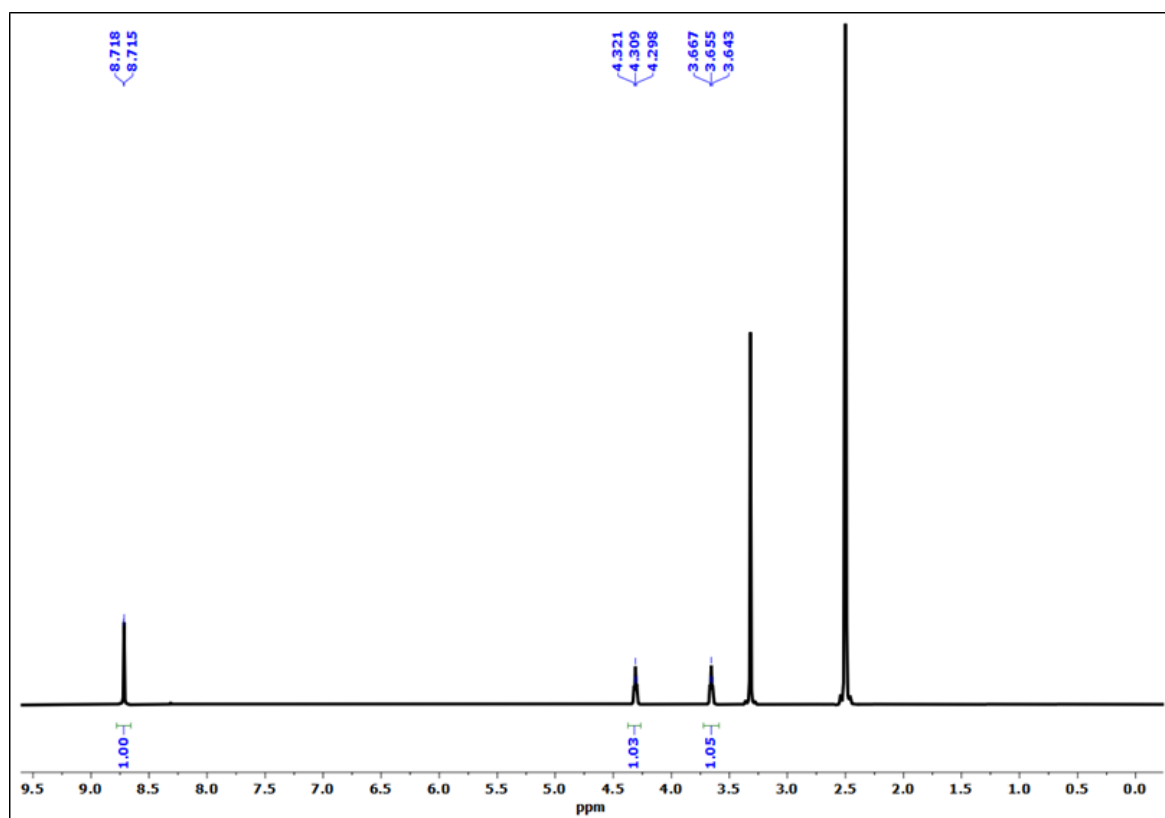

Figure S4.  $^1H$  NMR spectrum of NDIAz in  $DMSO-d_6$  (400MHz) at 298 K.

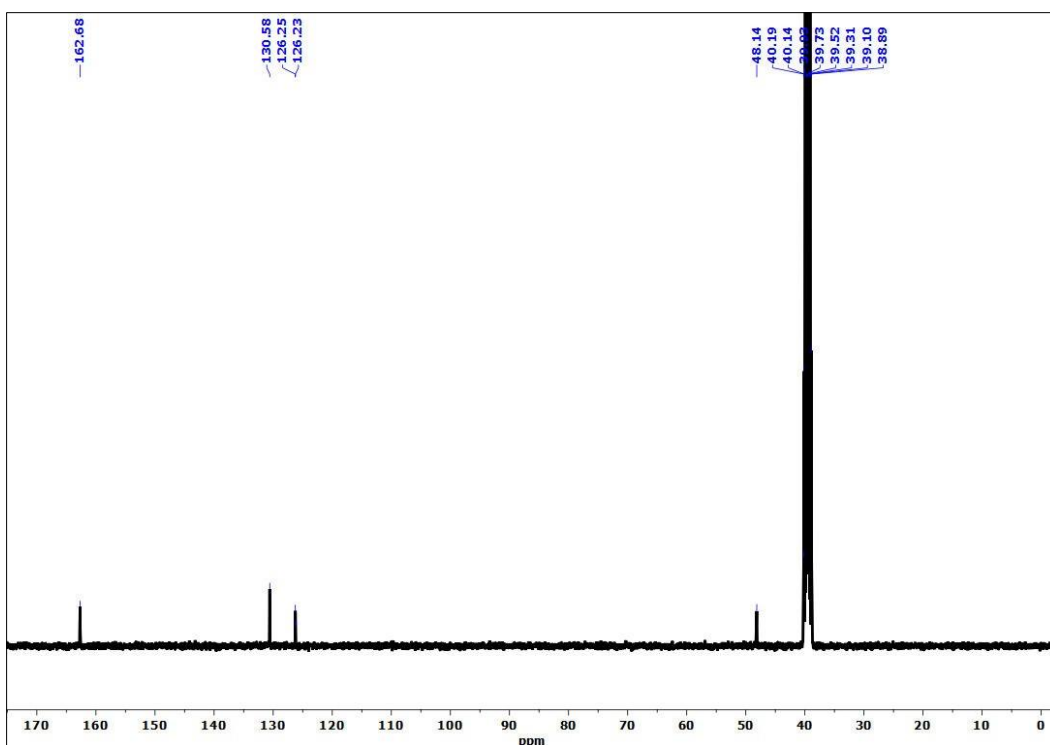

**Figure S5.**  $^{13}\text{C}$  NMR spectrum of NDIAz in DMSO- $d_6$  (100MHz) at 298 K

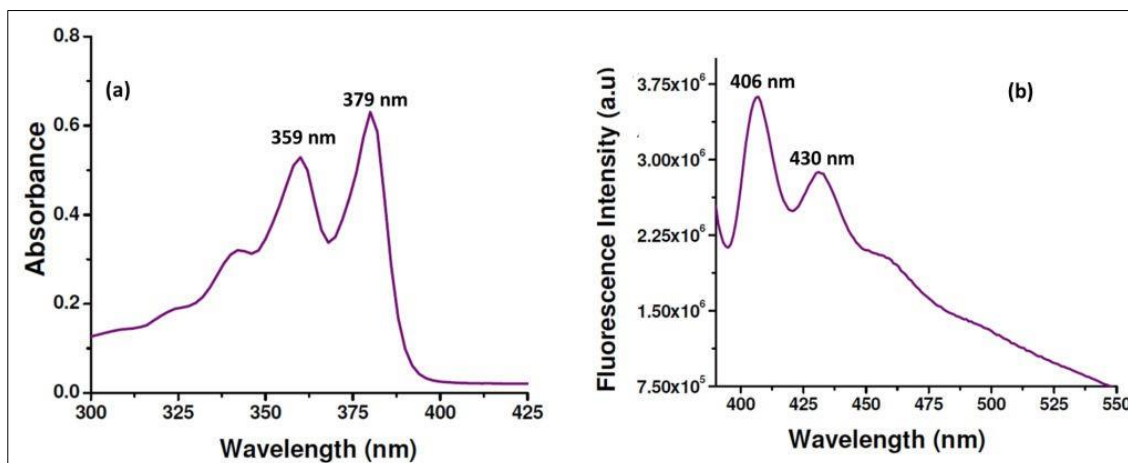

**Figure S6.** (a) UV-Vis and (b) PL spectrum of NDIAz in  $\text{CHCl}_3$ -DMF (4:1) at 298 K.

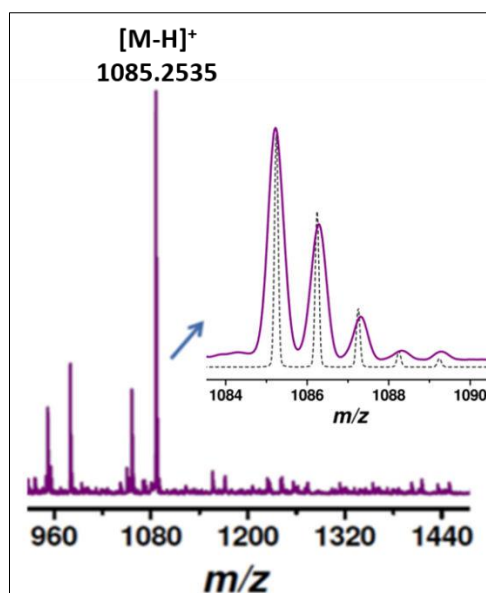

**Figure S7.** ESI-MS (+ve ion) spectra of **Ca-PRT**. Inset picture shows the similarity between isotopic distribution pattern (dotted) and the calculated (bold) one.

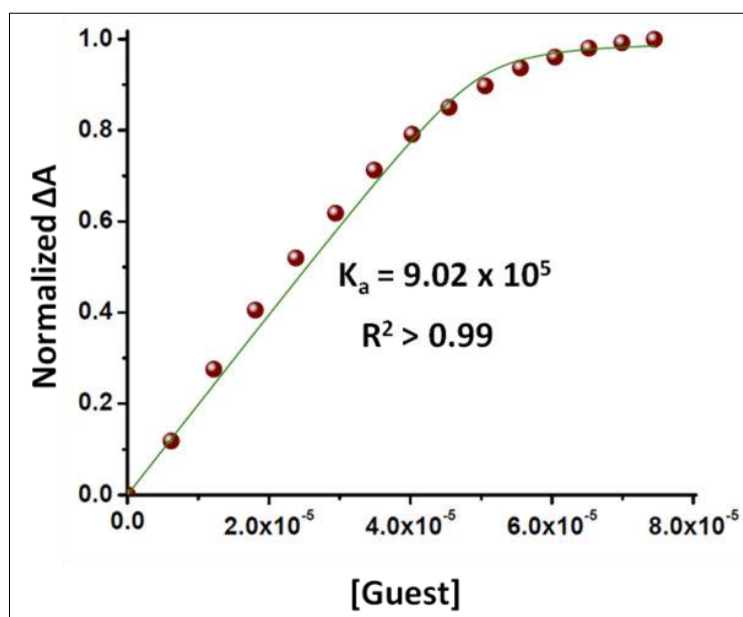

**Figure S8.** Non-linear 1:1 curve fitting plot from UV titration experiment to determine binding constant for the formation of **NDIAz** ( $2 \times 10^{-5} M$ ) and **Ca-PhenMC** ( $2 \times 10^{-4} M$ ) in  $CHCl_3$ -DMF (4:1) at 298 K.



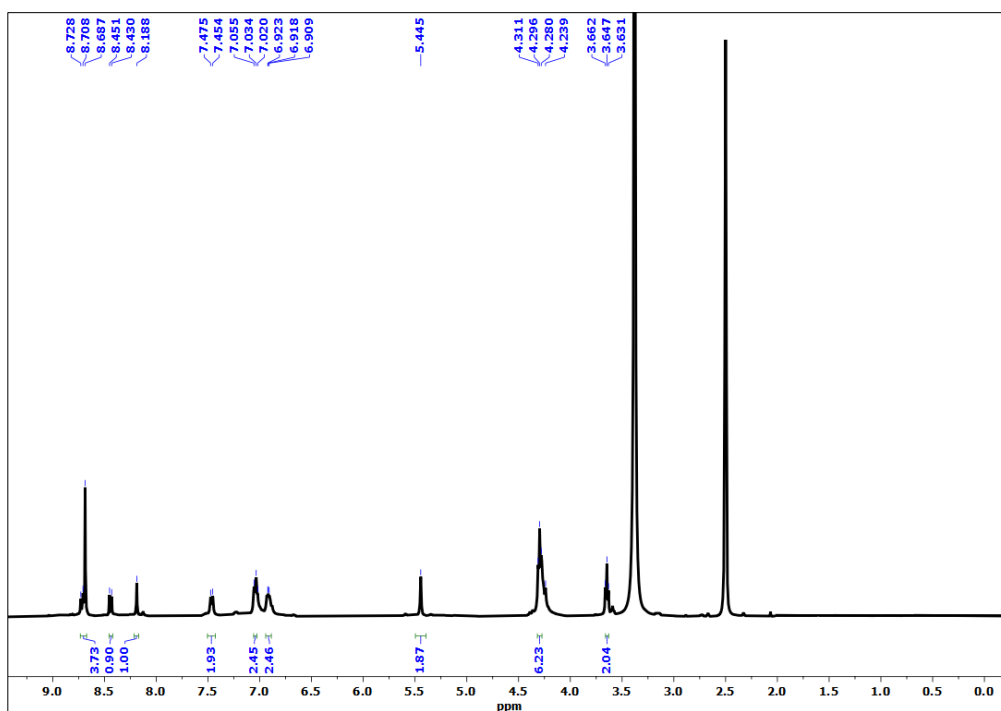

**Figure S9.**  $^1\text{H}$  NMR spectrum of Ca-PRT in DMSO- $d_6$  (400MHz) at 298 K.

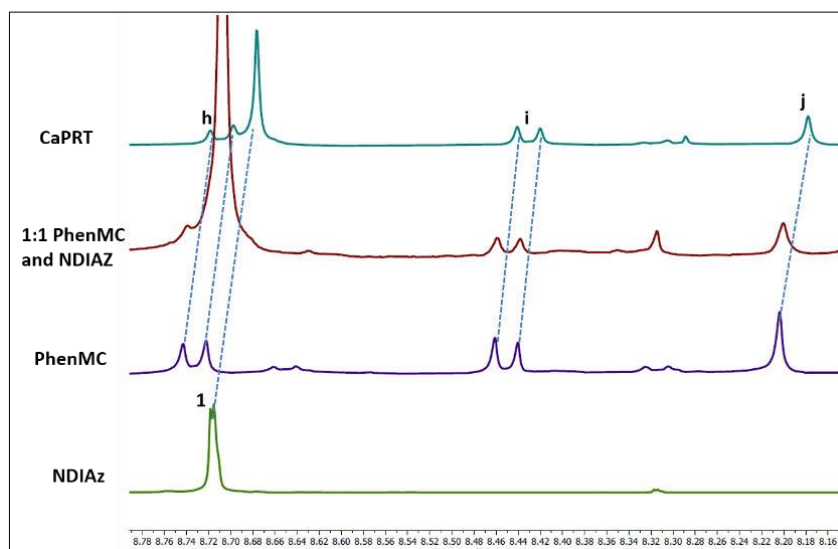

**Figure S9a.** Comparative  $^1\text{H}$  NMR of Ca-PRT, 1:1 PhenMC-NDIAz, PhenMC and NDIAz in DMSO- $d_6$  (400 MHz) at 298 K.

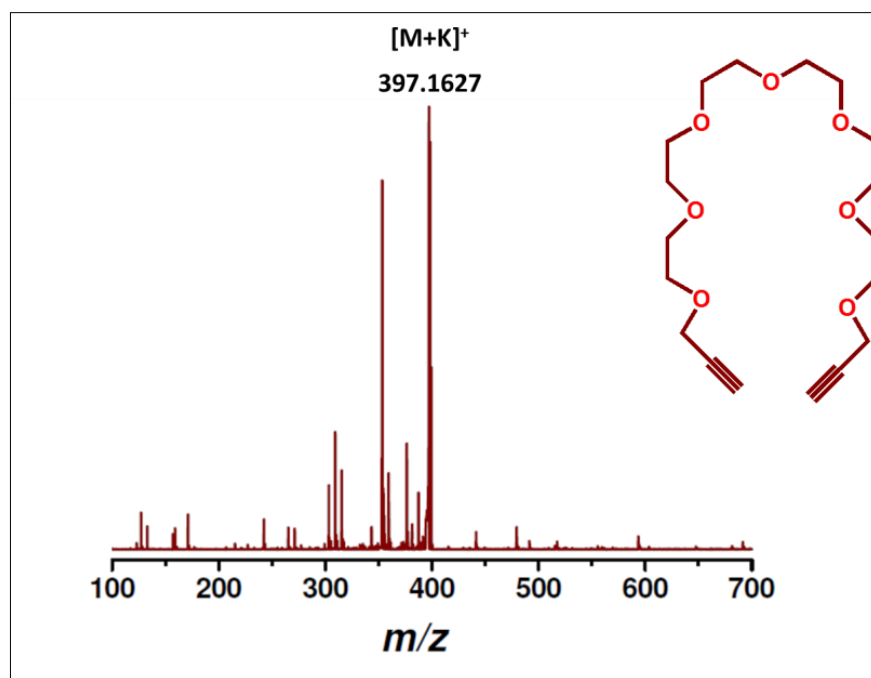

**Figure S10.** ESI-MS (+ve ion) spectrum of **HEXPR**.

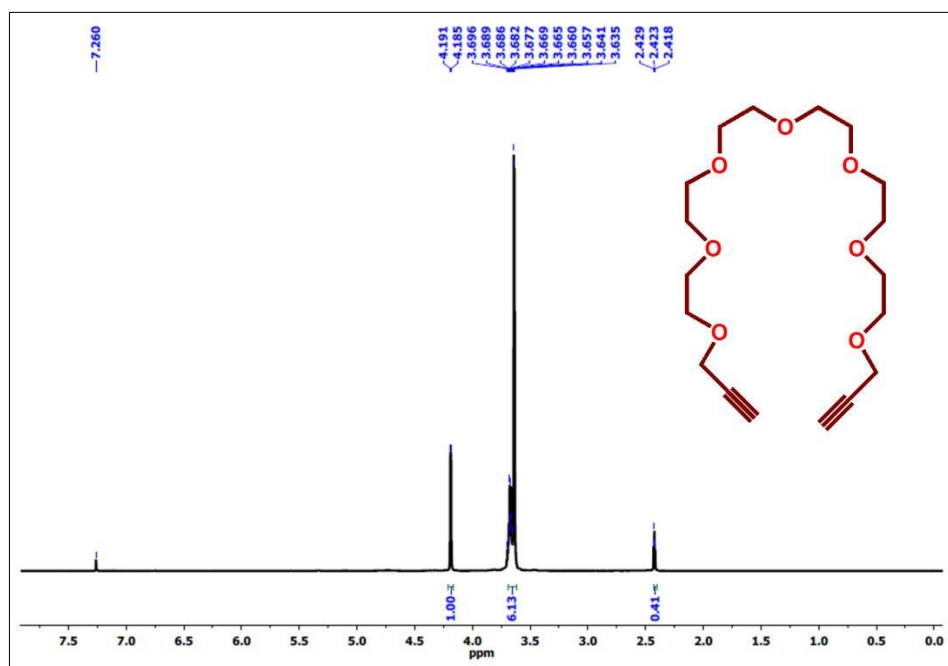

**Figure S11.**  $^1\text{H}$  NMR spectrum of **HEXPR** in  $\text{CDCl}_3$  (400MHz) at 298 K

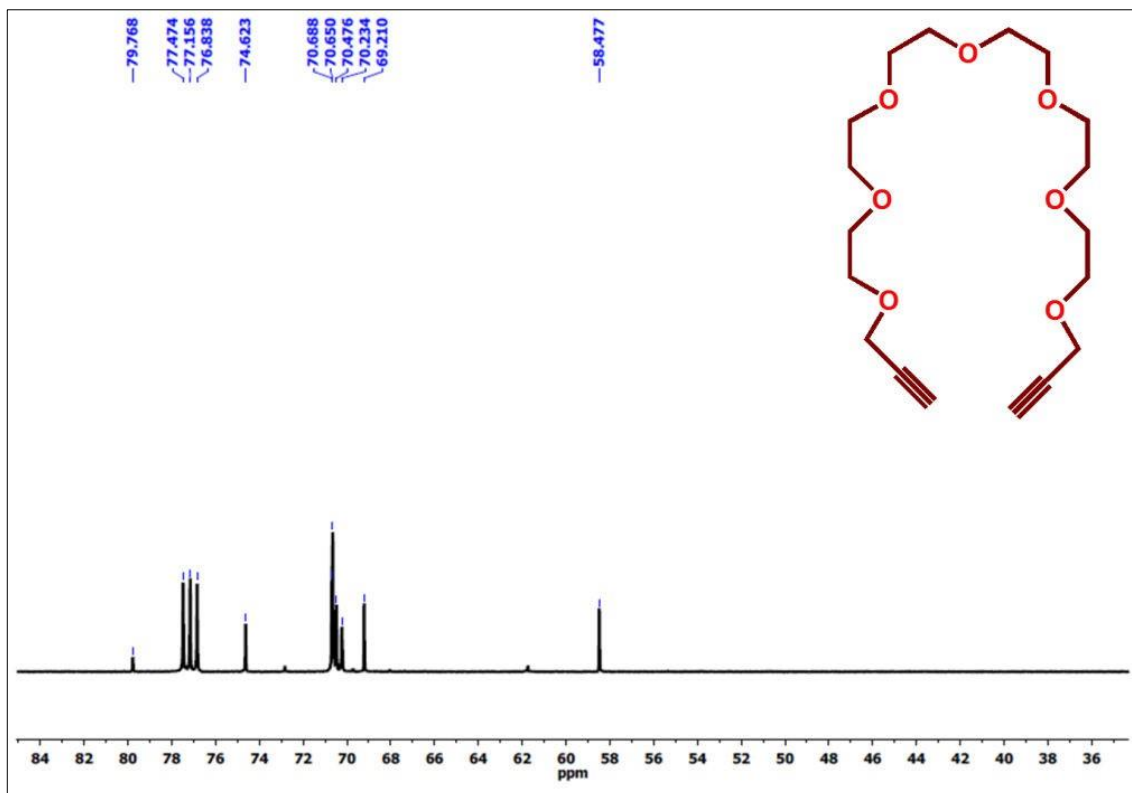

Figure S12.  $^{13}\text{C}$  NMR spectrum of **HEXPR** in  $\text{CDCl}_3$  (100MHz) at 298 K

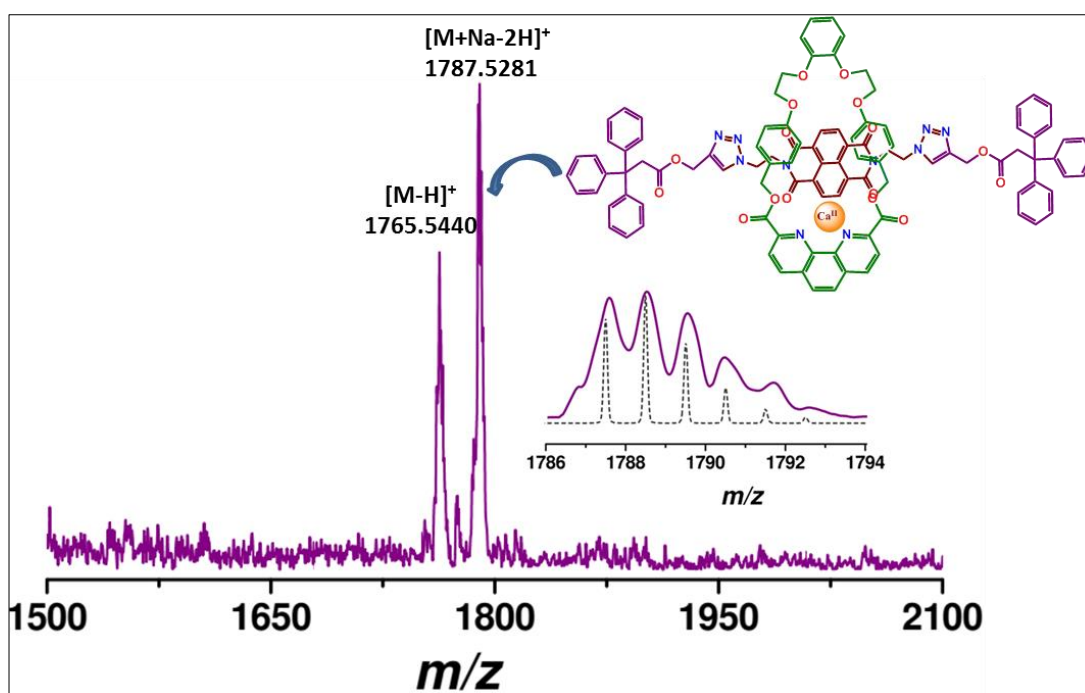

Figure S13. ESI-MS (+ve ion) spectrum of **Ca-NDIROT**

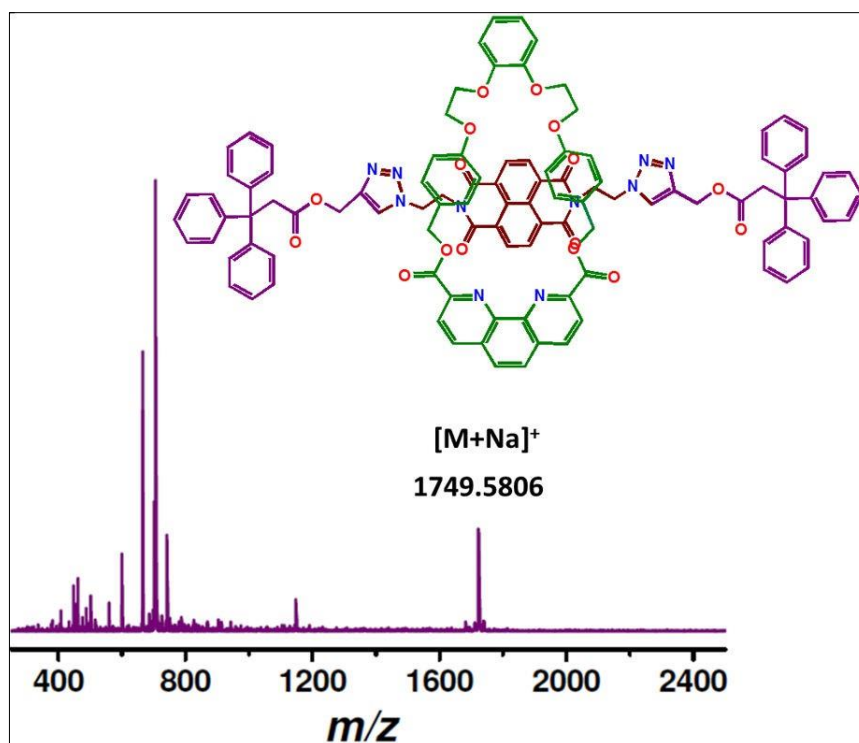

Figure S14. ESI-MS (+ve ion) spectrum of NDIROT

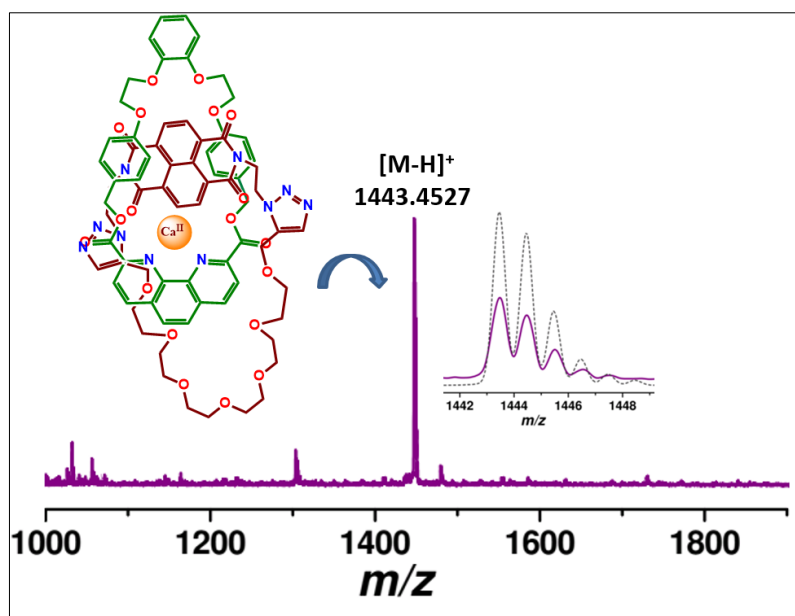

Figure S15. ESI-MS (+ve ion) spectrum of Ca-NDICAT

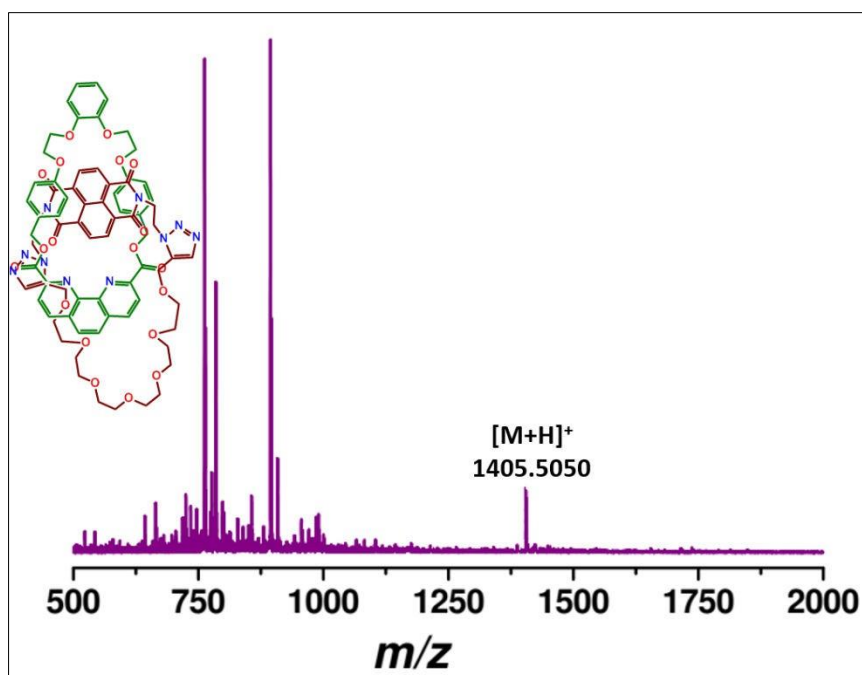

Figure S16. ESI-MS (+ve ion) spectrum of NDICAT

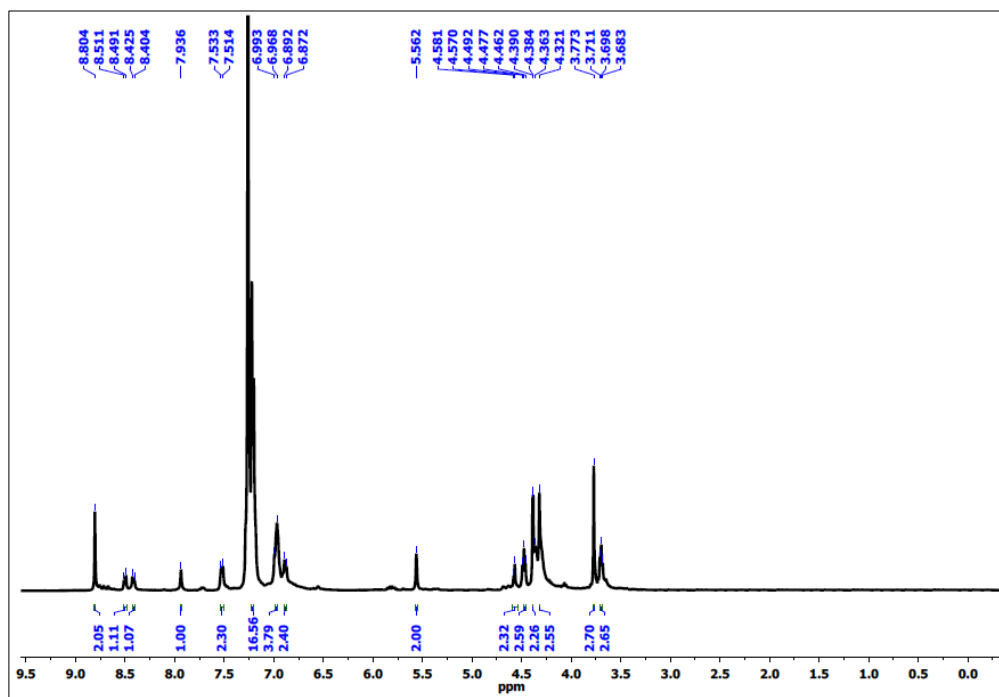

Figure S17.  $^1H$  NMR spectrum of NDIROT in  $CDCl_3$  (400MHz) at 298 K

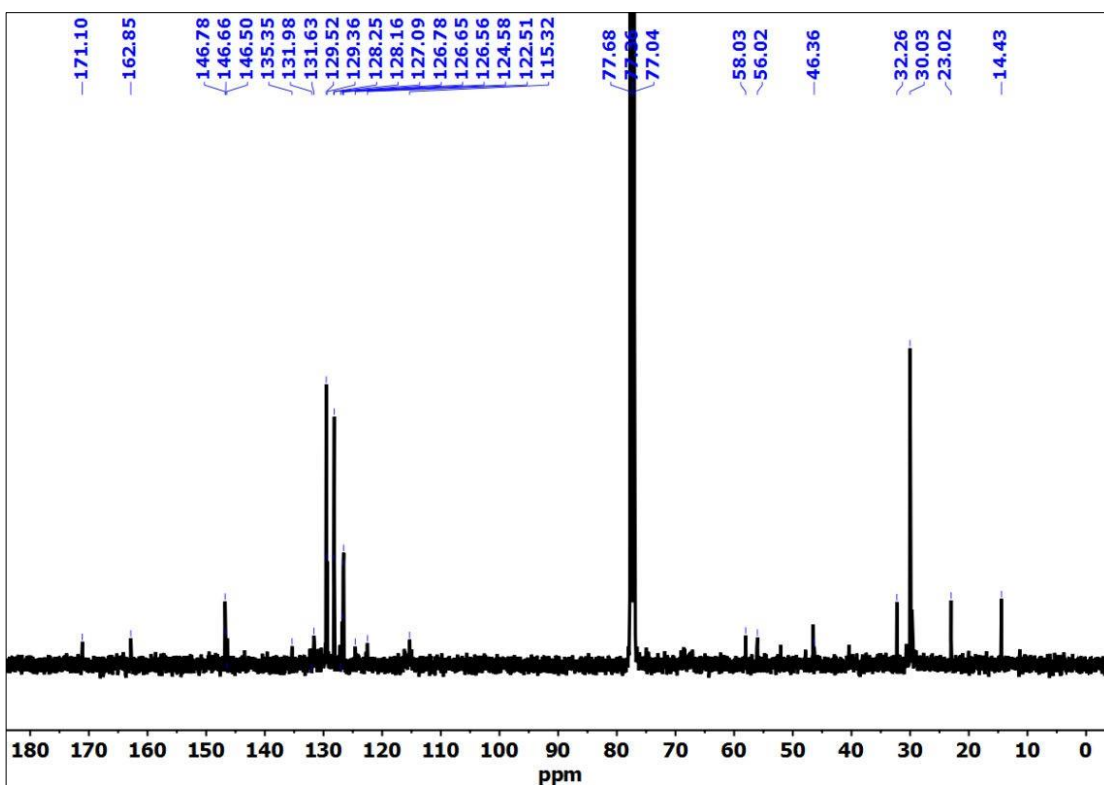

Figure S18.  $^{13}\text{C}$  NMR spectrum of NDIROT in  $\text{CDCl}_3$  (100MHz) at 298 K

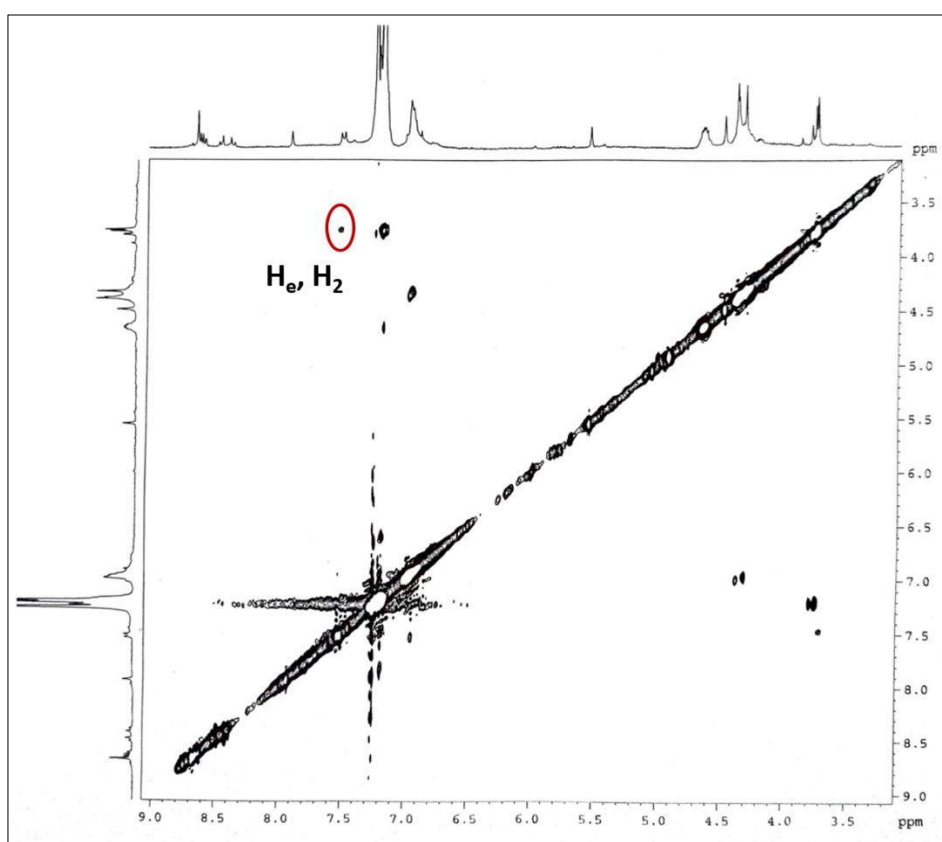

Figure S18a. ROESY spectrum of NDIROT in  $\text{CDCl}_3$  (300MHz) at 298 K

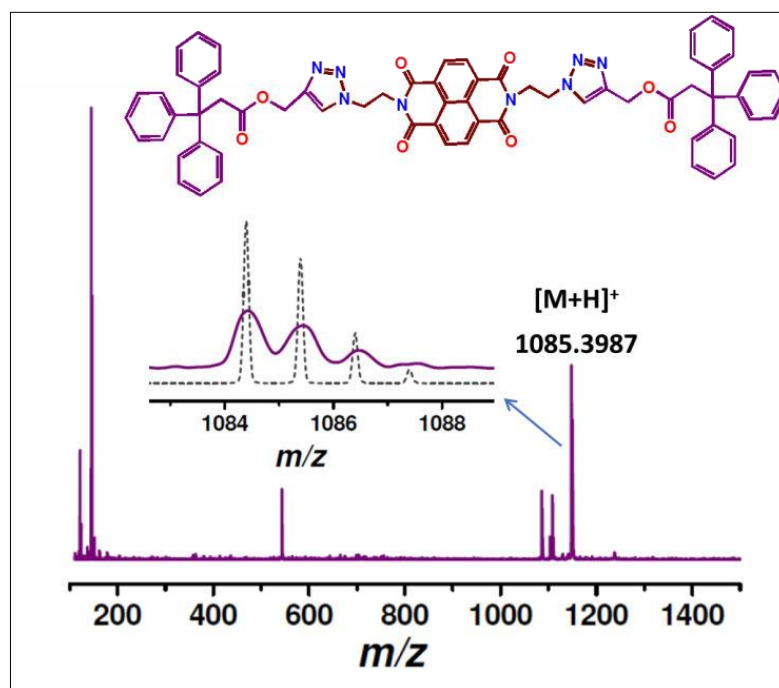

Figure S19. ESI-MS (+ve ion) spectrum of NDI-AXSTP

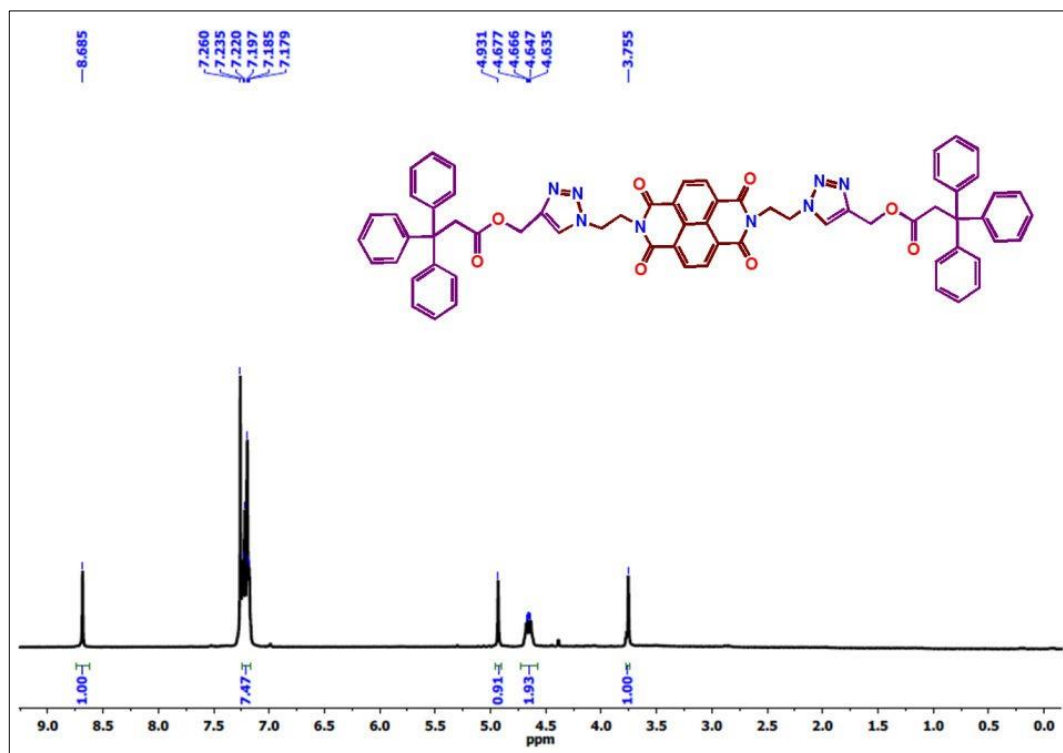

Figure S20.  $^1\text{H}$  NMR spectrum of NDI-AXSTP in  $\text{CDCl}_3$  (400MHz) at 298 K

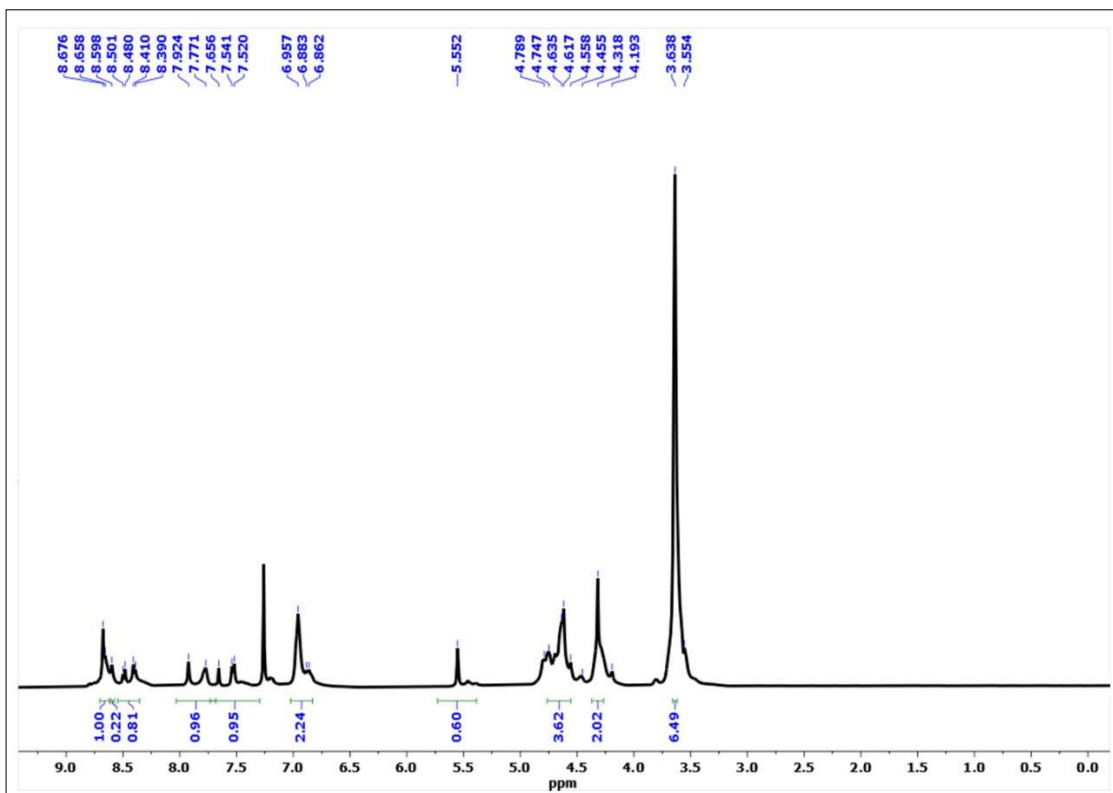

Figure S21.  $^1\text{H}$  NMR spectrum of NDICAT in  $\text{CDCl}_3$  (400MHz) at 298 K

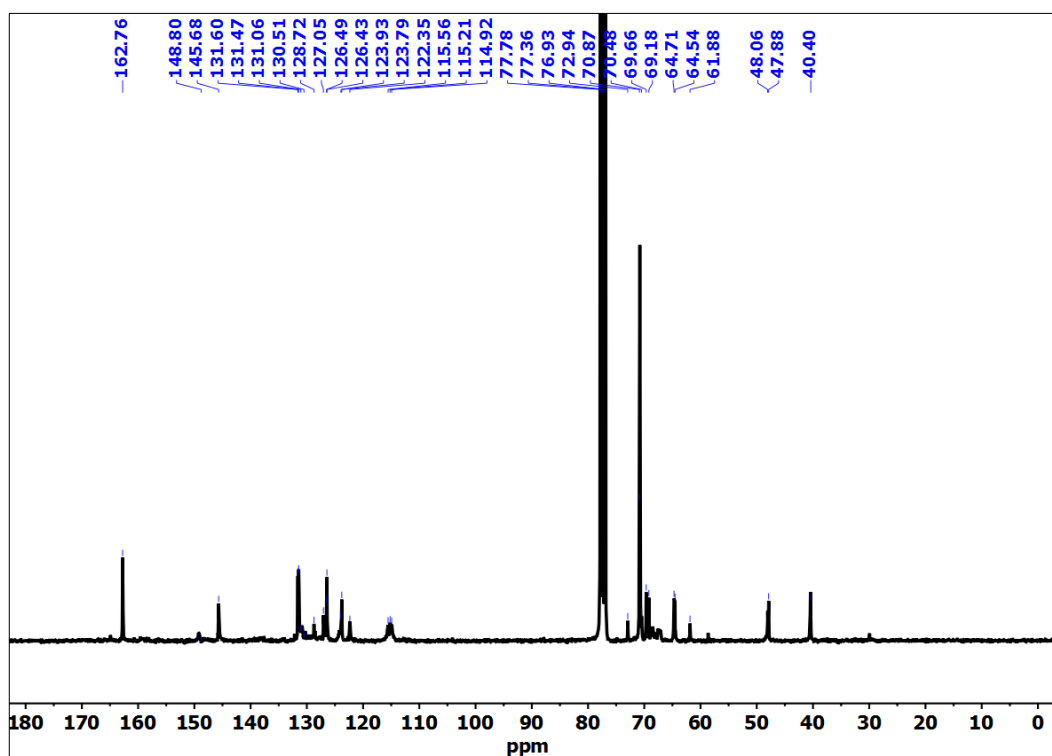

Figure S22.  $^{13}\text{C}$  NMR spectrum of NDICAT in  $\text{CDCl}_3$  (75MHz) at 298 K



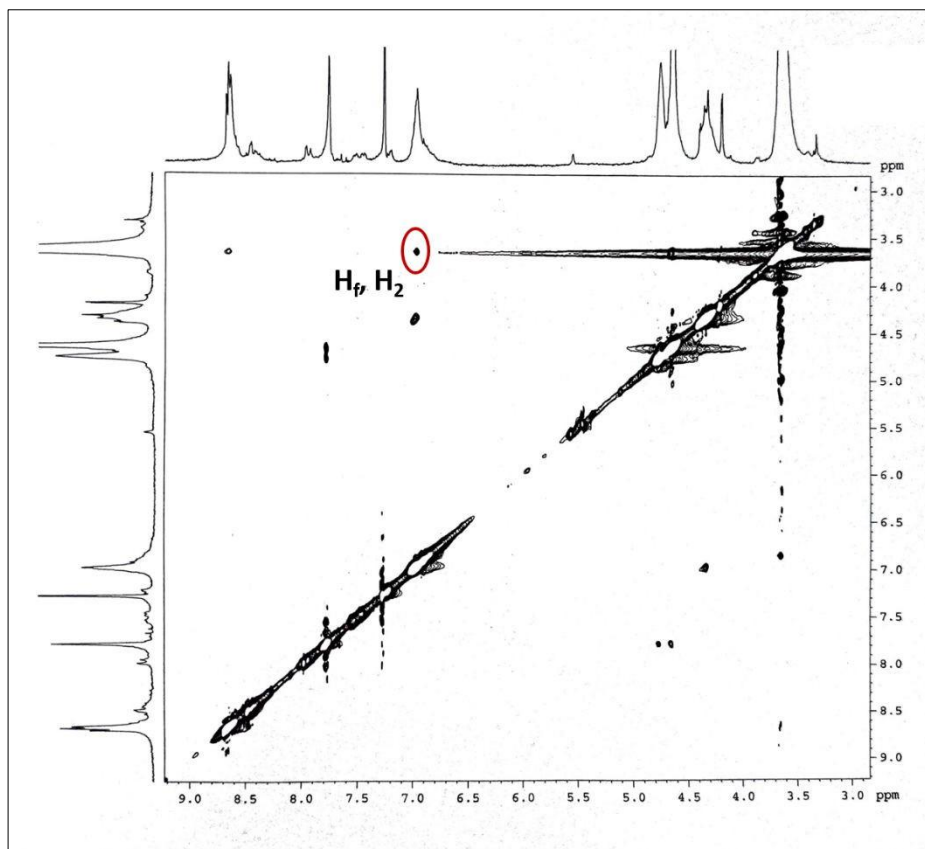

**Figure S22a.** ROESY spectrum of NDICAT in  $CDCl_3$  (300MHz) at 298 K

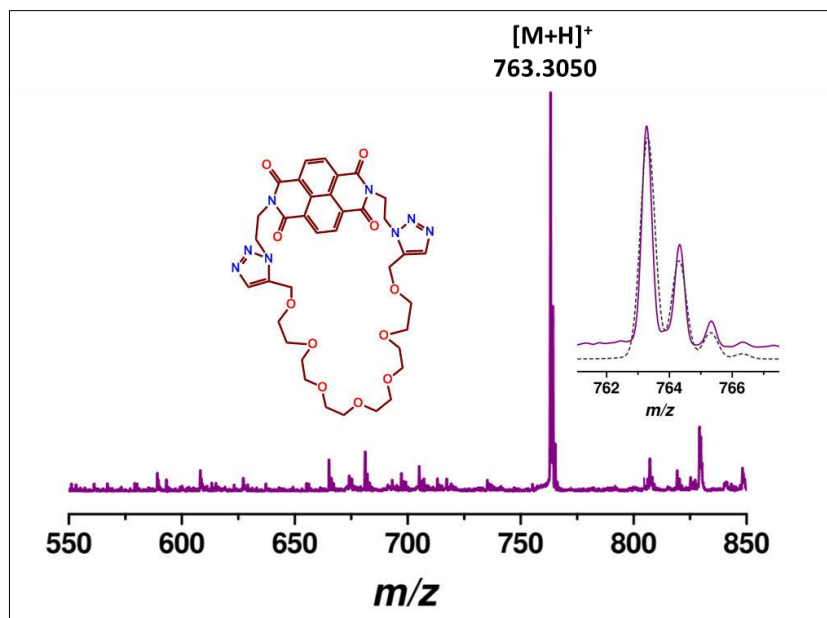

**Figure S23.** ESI-MS (+ve ion) spectrum of NDIMC.

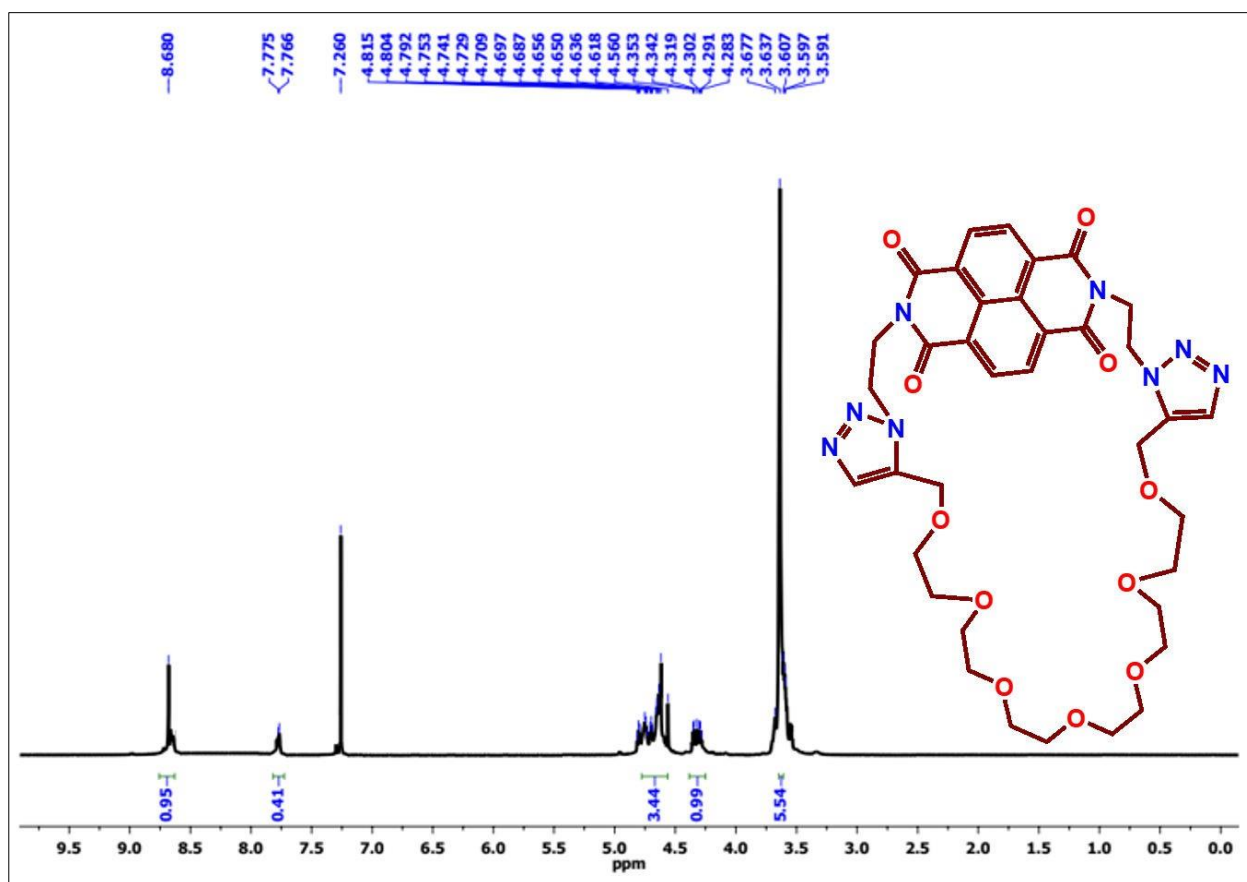

Figure S24.  $^1\text{H}$  NMR spectrum of NDIMC in  $\text{CDCl}_3$  (400MHz) at 298 K

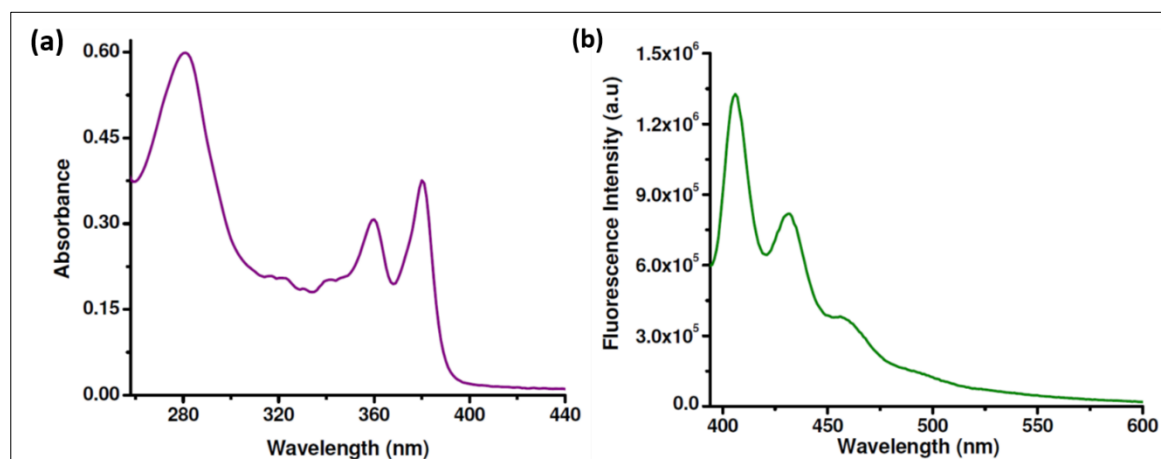

Figure S25. a) UV-Vis and b) PL spectrum of NDIROT in  $\text{CHCl}_3$  at 298K

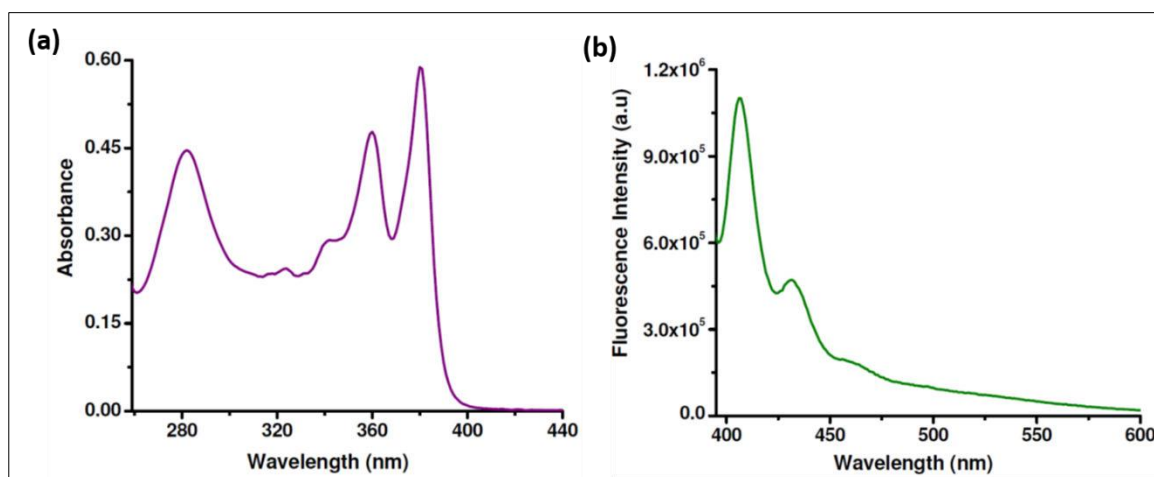

**Figure S26.** a) UV-Vis and b) PL spectrum of **NDICAT** in  $\text{CHCl}_3$  at 298K

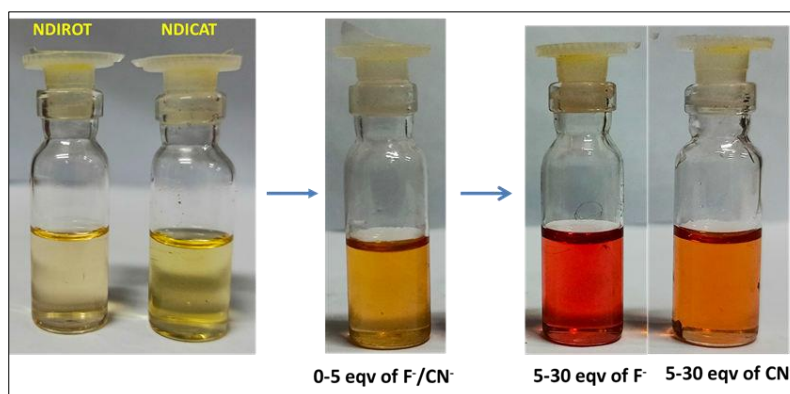

**Figure S27.** Snapshot of characteristic colour changes of (a) **NDIROT** and (b) **NDICAT** during addition 0.5 to 100 eqv. of  $\text{F}^-$  and  $\text{CN}^-$  in DMSO.

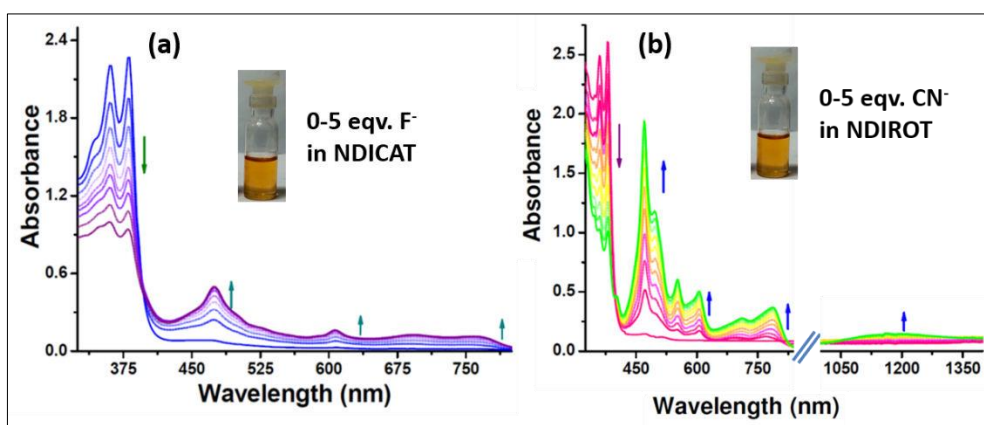

**Figure S28.** UV-Vis-NIR changes of (a) **NDICAT** (0.2mM) upon addition of  $\text{F}^-$  and (b) **NDIROT** (0.2mM) upon addition of  $\text{CN}^-$  in DMSO at 298K.

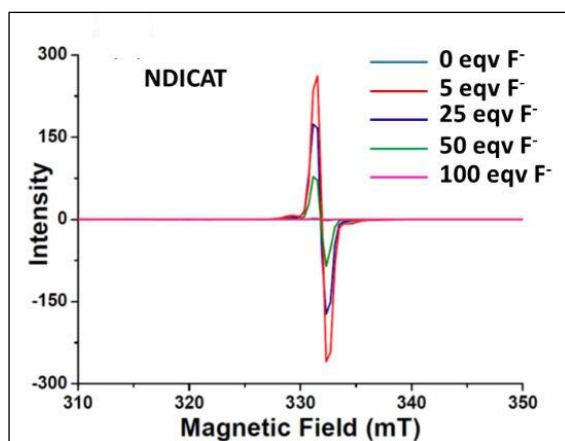

**Figure S29.** X-band EPR spectra of **NDICAT** (0.2 mM) in DMSO at 298 K.

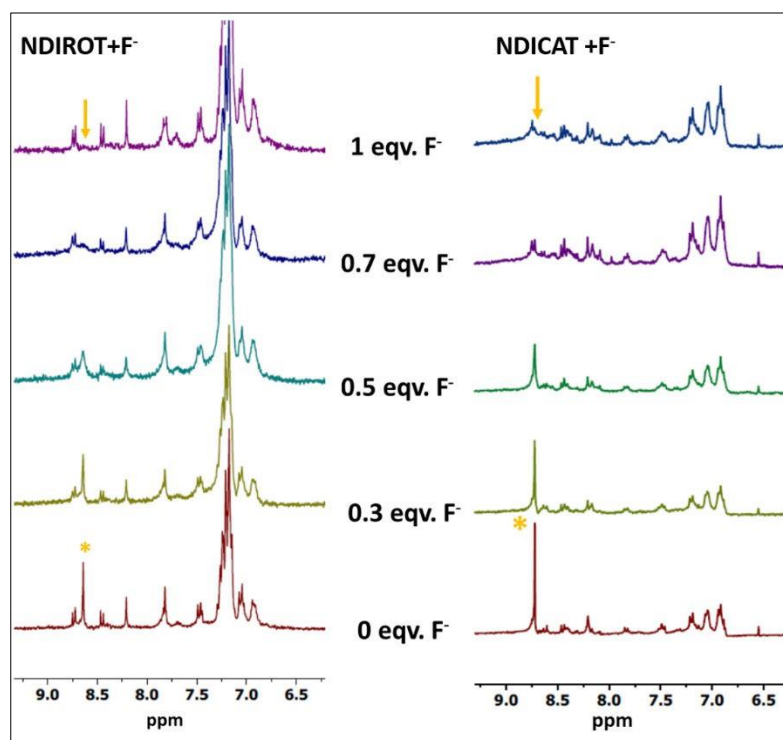

**Figure S30.**  $^1\text{H}$  NMR spectra of NDIROT/NDICAT (0.2 mM) after treatment with different equivalents of  $\text{F}^-$  in  $\text{d}_6$ -DMSO at 298 K.

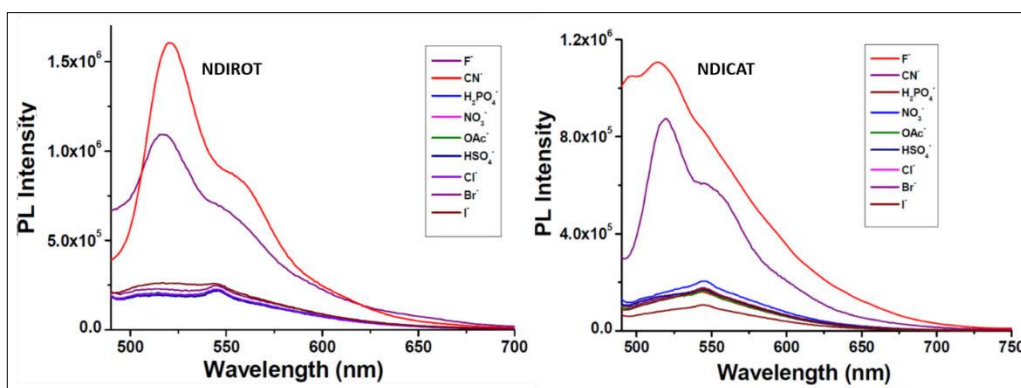

**Figure S31.** Comparative PL spectra of **NDIROT** (0.2mM) and **NDICAT** (0.2mM) upon addition of various anions of TBA salts at 298K in DMSO.
